# Supplementary material for: The kinetics and mechanism of photo-assisted Ag(i)-catalysed water oxidation with S2O82−
Source: Royal Society of Chemistry journal article supplement (doi:10.1039/c4dt02254h), 2014-11-03
Supplement: c4dt02254h1.pdf [file c4dt02254h1.pdf]

## Supporting Information

### **Kinetics and Mechanism of Photo-Assistant Ag(I)-Catalysed Water Oxidation with $S_2O_8^{2-}$**

**Lihong Yu,<sup>a</sup> Jidan Wang,<sup>a</sup> Dan Guo,<sup>a</sup> Wansheng You,<sup>\*a</sup> Meiyong Liu,<sup>a</sup> Lancui Zhang,<sup>a</sup> and Can Li<sup>\*b</sup>**

<sup>a</sup> Institute of Chemistry for Functionalized Materials, Liaoning Normal University, 850 Huanghe Road, Dalian 116029, P. R. China.

<sup>b</sup> State Key Laboratory of Catalysis, Dalian Institute of Chemical Physics, The Chinese Academy of Sciences, 457 Zhongshan Road, Dalian 116023, P. R. China.

---

\* Corresponding author. Tel: +86-411-82159378, Fax: +86-411-82156858  
e-mail: [wyou@lnnu.edu.cn](mailto:wyou@lnnu.edu.cn) (Wansheng You); [canli@dicp.ac.cn](mailto:canli@dicp.ac.cn) (Can Li)

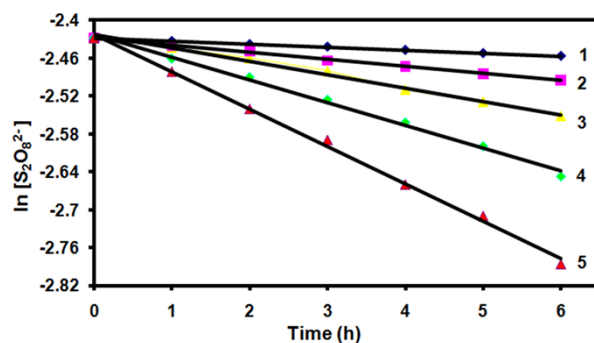

Fig. S1. Plots of  $\ln c(\text{S}_2\text{O}_8^{2-})$  vs. time for  $\text{AgNO}_3$ - $\text{Na}_2\text{S}_2\text{O}_8$  in 100 ml pure water system without illumination at  $24.5 \pm 0.5$  °C.  $\text{Na}_2\text{S}_2\text{O}_8$ :  $8.82 \times 10^{-2}$  mol L $^{-1}$ .  $\text{AgNO}_3$ : (1)  $5.88 \times 10^{-4}$  mol L $^{-1}$ ; (2)  $1.18 \times 10^{-3}$  mol L $^{-1}$ ; (3)  $2.35 \times 10^{-3}$  mol L $^{-1}$ ; (4)  $4.71 \times 10^{-3}$  mol L $^{-1}$ ; (5)  $7.06 \times 10^{-3}$  mol L $^{-1}$ .

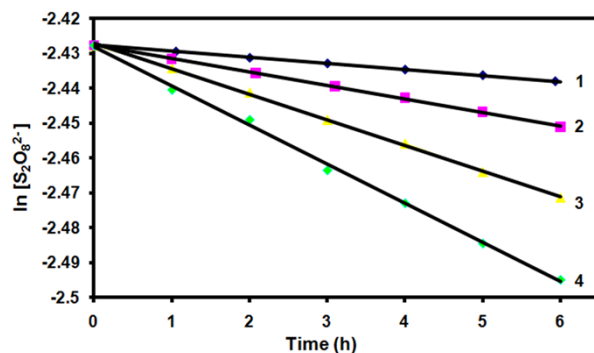

Fig. S2. Plots of  $\ln c(\text{S}_2\text{O}_8^{2-})$  vs. time for  $\text{AgNO}_3$ - $\text{Na}_2\text{S}_2\text{O}_8$  in 100 ml pure water system at different temperatures without illumination.  $\text{Na}_2\text{S}_2\text{O}_8$ :  $8.82 \times 10^{-2}$  mol L $^{-1}$ .  $\text{AgNO}_3$ :  $1.18 \times 10^{-3}$  mol L $^{-1}$ . (1)  $4.5 \pm 0.5$  °C; (2)  $11.5 \pm 0.5$  °C; (3)  $17.5 \pm 0.5$  °C; (4)  $24.5 \pm 0.5$  °C.

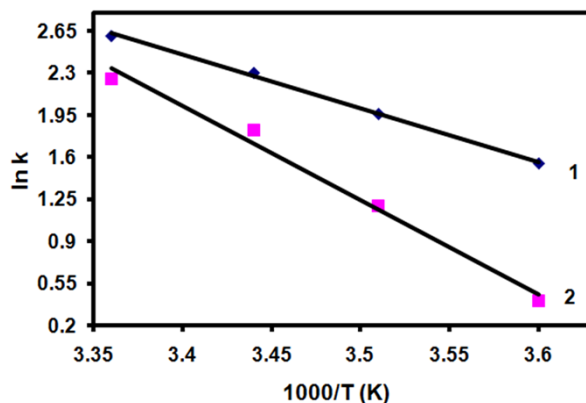

Fig. S3. The activation energy of  $\text{Ag}^+$ -catalysed water oxidation of  $\text{S}_2\text{O}_8^{2-}$  into  $\text{O}_2$ . Plots of  $\ln k$  vs.  $1000/T(\text{K})$ . The  $k$  values and the temperatures come from Table 2. 1: under visible light ( $\geq 400$  nm); 2: without illumination.

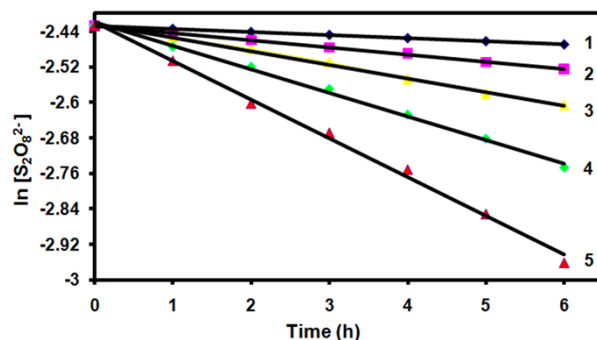

Fig. S4. Plots of  $\ln c(\text{S}_2\text{O}_8^{2-})$  vs. time for  $\text{AgNO}_3$ - $\text{Na}_2\text{S}_2\text{O}_8$  in 100 ml pure water system under the irradiation of a Xe lamp of 300 W equipped with an ultraviolet cutoff filter to provide visible light ( $\lambda \geq 400$  nm) at  $24.5 \pm 0.5$  °C.  $\text{Na}_2\text{S}_2\text{O}_8$ :  $8.82 \times 10^{-2}$  mol L<sup>-1</sup>.  $\text{AgNO}_3$ : (1)  $5.88 \times 10^{-4}$  mol L<sup>-1</sup>; (2)  $1.18 \times 10^{-3}$  mol L<sup>-1</sup>; (3)  $2.35 \times 10^{-3}$  mol L<sup>-1</sup>; (4)  $4.71 \times 10^{-3}$  mol L<sup>-1</sup>; (5)  $7.06 \times 10^{-3}$  mol L<sup>-1</sup>.

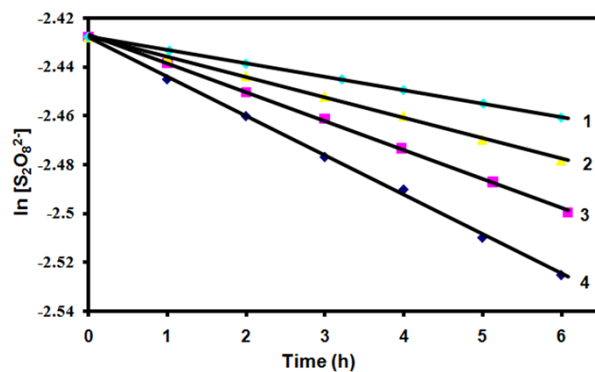

Fig. S5 Plots of  $\ln c(\text{S}_2\text{O}_8^{2-})$  vs. time for  $\text{Ag}^+$ - $\text{Na}_2\text{S}_2\text{O}_8$  in 100 ml pure water system at different temperatures under the irradiation of a Xe lamp of 300 W equipped with an ultraviolet cutoff filter to provide visible light ( $\lambda \geq 400$  nm).  $\text{Na}_2\text{S}_2\text{O}_8$ :  $8.82 \times 10^{-2}$  mol L<sup>-1</sup>.  $\text{AgNO}_3$ :  $1.18 \times 10^{-3}$  mol L<sup>-1</sup>. (1)  $4.5 \pm 0.5$  °C; (2)  $11.5 \pm 0.5$  °C; (3)  $17.5 \pm 0.5$  °C; (4)  $24.5 \pm 0.5$  °C.

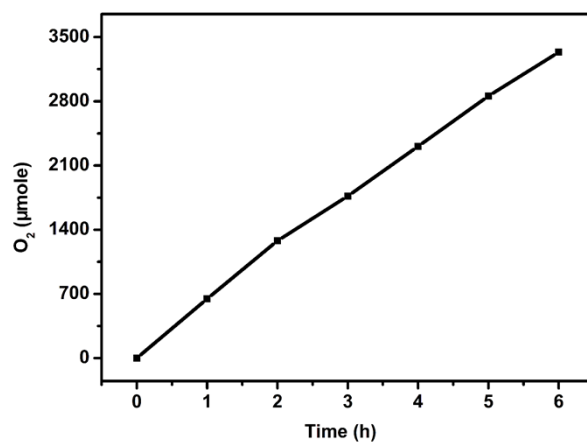

Fig. S6. Time course of  $\text{O}_2$  evolution from 100 ml solution of  $\text{H}_2\text{O}_2$ ,  $\text{AgNO}_3$  and  $\text{Na}_2\text{S}_2\text{O}_8$  without illumination at  $24.5 \pm 0.5$  °C.  $\text{Na}_2\text{S}_2\text{O}_8$ :  $8.82 \times 10^{-2}$  mol L<sup>-1</sup>.  $\text{AgNO}_3$ :  $1.18 \times 10^{-3}$  mol L<sup>-1</sup>. 1 ml 30%  $\text{H}_2\text{O}_2$ .

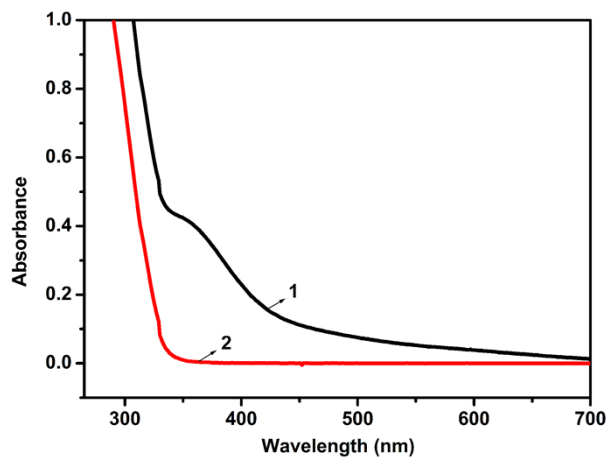

Fig. S7. UV-Visible spectra of the solution of (1)  $\text{Na}_2\text{S}_2\text{O}_8$  ( $8.82 \times 10^{-2} \text{ mol L}^{-1}$ ) and  $\text{AgNO}_3$  ( $7.06 \times 10^{-3} \text{ mol L}^{-1}$ ); (2)  $\text{H}_2\text{O}_2$  is added to (1).

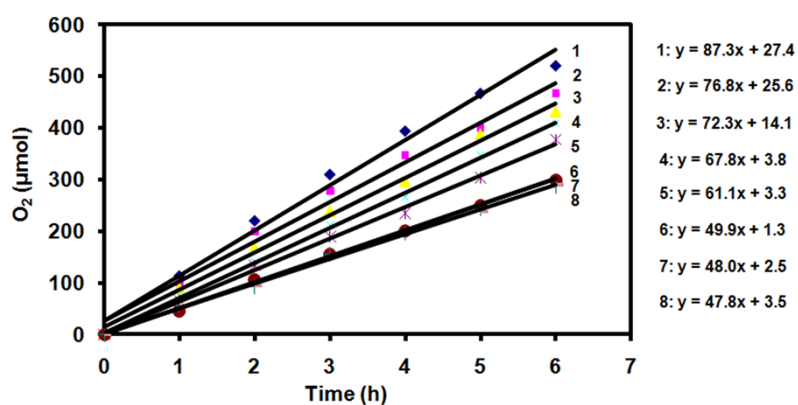

Fig. S8. Plots of  $\text{O}_2$  vs. time for 100 ml solution of  $\text{AgNO}_3$  ( $1.18 \times 10^{-3} \text{ mol L}^{-1}$ ) and  $\text{Na}_2\text{S}_2\text{O}_8$  ( $8.82 \times 10^{-2} \text{ mol L}^{-1}$ ) at  $24.5 \pm 0.5 \text{ }^\circ\text{C}$  under the irradiation of a 300 W Xe lamp equipped with cutoff filters of (1)  $\lambda \geq 370 \text{ nm}$ , (2)  $\lambda \geq 380 \text{ nm}$ , (3)  $\lambda \geq 390 \text{ nm}$ , (4)  $\lambda \geq 400 \text{ nm}$ , (5)  $\lambda \geq 420 \text{ nm}$ , (6)  $\lambda \geq 500 \text{ nm}$  and (7)  $\lambda \geq 660 \text{ nm}$  and (8) without illumination.

## Steady State Analysis of the Proposed Mechanism

Several differential equations can be set up from this mechanism

$$dc(O_2)/dt = -dc(AgO^+)/dt = k_7 c(AgO^+) \quad S1$$

$$dc(AgO^+)/dt = k_4 c(Ag^{2+}) c(OH^-) - k_8 c(AgO^+) \quad S2$$

$$dc(Ag^{2+})/dt = k_1 c(Ag^+) c(S_2O_8^{2-}) - k_4 c(Ag^{2+}) c(OH^-) \quad S3$$

By the steady state hypothesis,  $c(AgO^+)$  and  $c(Ag^{2+})$  are constant, therefore

$$dc(AgO^+)/dt = dc(Ag^{2+})/dt = 0 \quad S4$$

Thus, from (S2) and (S4)

$$k_8 c(AgO^+) = k_4 c(Ag^{2+}) c(OH^-) \quad S5$$

from (S3) and (S4)

$$k_4 c(Ag^{2+}) c(OH^-) = k_1 c(Ag^+) c(S_2O_8^{2-}) \quad S6$$

Substitution of (S6) in (S5) gives

$$c(AgO^+) = k_1 k_8^{-1} c(Ag^+) c(S_2O_8^{2-}) \quad S7$$

Substitution of (S7) in (S1) gives

$$dc(O_2)/dt = k_7 k_1 k_8^{-1} c(Ag^+) c(S_2O_8^{2-}) \quad S8$$

which is simplified into

$$dc(O_2)/dt = k c(Ag^+) c(S_2O_8^{2-}) \quad S9$$
